# Supplementary material for: One-pot fabrication of an anisotropic thermally conductive boron nitride/polyvinyl alcohol composite film based on salting-out effect
Source: Royal Society of Chemistry journal article supplement (doi:10.1039/d3nj00311f), 2023-01-01
Supplement: d3nj00311f1.pdf [file d3nj00311f1.pdf]

## One-pot Fabrication of an Anisotropically Thermal Conductive Boron Nitride/Polyvinyl Alcohol Composite Film Based on Salting-out Effect

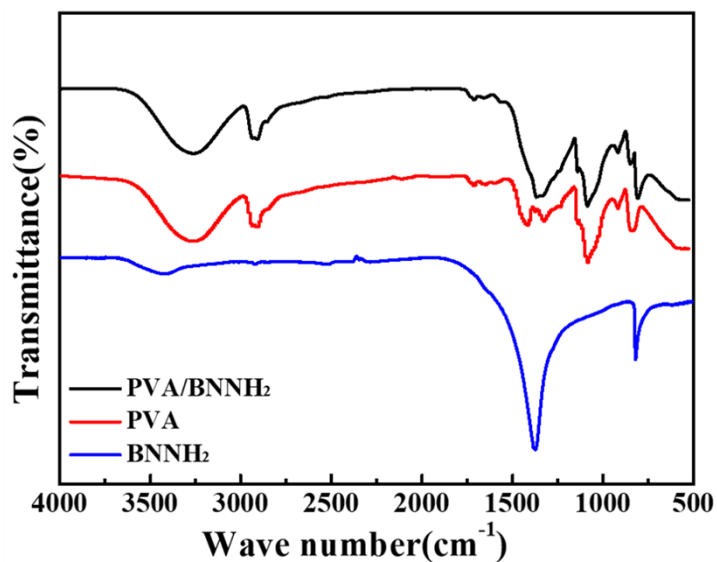

**Fig.S1** FTIR spectra of BNNH<sub>2</sub> (blue), PVA (red) and PVA/BNNH<sub>2</sub> film (black).

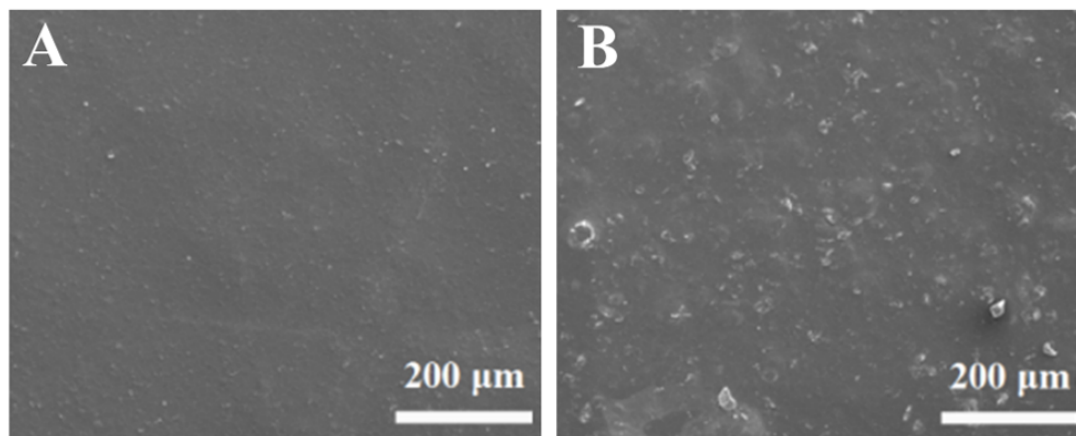

**Fig.S2** The surface SEM images of PVA and PVA/BNNH<sub>2</sub> film with 30 wt % fillers.
